# Supplementary material for: Safety and Effectiveness of Apixaban Versus Warfarin in Japanese Patients with Nonvalvular Atrial Fibrillation Stratified by Renal Function: A Retrospective Cohort Study
Source: Springer Nature journal article supplement (doi:10.1007/s40256-023-00611-7), 2023-10-17
Supplement: MOESM1 [file 26191134]

## Supplementary Information

*American Journal of Cardiovascular Drugs*

# **Safety and Effectiveness of Apixaban Versus Warfarin in Japanese Patients with Nonvalvular Atrial Fibrillation Stratified by Renal Function: A Retrospective Cohort Study**

Takeshi Morimoto<sup>1</sup>; Haruhiko Hoshino<sup>2</sup>; Yukako Matsuo<sup>3</sup>; Tatsuki Ibuki<sup>4</sup>; Kayoko Miyata<sup>3</sup>;  
Yukihiro Koretsune<sup>5</sup>

<sup>1</sup>Department of Clinical Epidemiology, Hyogo Medical University, Hyogo, Japan

<sup>2</sup>Department of Neurology, Tokyo Saiseikai Central Hospital, Tokyo, Japan

<sup>3</sup>Medical Department, Bristol Myers Squibb K.K., Tokyo, Japan

<sup>4</sup>Medical Affairs, Pfizer Japan Inc., Tokyo, Japan

<sup>5</sup>Cardiovascular Division, National Hospital Organization Osaka National Hospital, Osaka, Japan

### **Correspondence**

Takeshi Morimoto, MD, PhD, MPH

Department of Clinical Epidemiology, Hyogo Medical University

1-1 Mukogawacho, Nishinomiya, Hyogo 663-8501, Japan

E-mail: [morimoto@kuhp.kyoto-u.ac.jp](mailto:morimoto@kuhp.kyoto-u.ac.jp)

Online Resource 1: Variables used for the calculation of propensity score and standardized mean difference

| Covariate                                    | Variable type | Category       | Before matching | After matching |
|----------------------------------------------|---------------|----------------|-----------------|----------------|
| Apixaban, N                                  |               |                | 7,074           | 4,523*         |
| Warfarin, N                                  |               |                | 4,998           | 4,523*         |
| SMD between the apixaban and warfarin groups |               |                |                 |                |
| Sex                                          | Nominal       | Male or Female | 0.064           | 0.021          |
| Age (years)                                  | Continuous    |                | 0.098           | 0.042          |
| Bodyweight (kg)                              | Continuous    |                | 0.015           | 0.008          |
| eGFR (mL/min/1.73 m <sup>2</sup> )           | Continuous    |                | 0.038           | 0.016          |
| Heart rate (bpm)                             | Continuous    |                | 0.057           | 0.020          |
| CHA <sub>2</sub> DS <sub>2</sub> -VASc score | Continuous    |                | 0.029           | 0.012          |
| Comorbidities                                |               |                |                 |                |
| CHF                                          | Nominal       | Yes or No      | 0.074           | 0.029          |
| Hypertension                                 | Nominal       | Yes or No      | 0.007           | 0.000          |
| Diabetes                                     | Nominal       | Yes or No      | 0.016           | 0.017          |
| Renal disease                                | Nominal       | Yes or No      | 0.089           | 0.042          |
| Dyslipidemia                                 | Nominal       | Yes or No      | 0.055           | 0.031          |
| CAD                                          | Nominal       | Yes or No      | 0.062           | 0.005          |
| PVD*                                         | Nominal       | Yes or No      | 0.052           | 0.051          |
| Malignant tumor                              | Nominal       | Yes or No      | 0.005           | 0.008          |
| Medical history                              |               |                |                 |                |
| Stroke/TIA                                   | Nominal       | Yes or No      | 0.009           | 0.010          |
| MI                                           | Nominal       | Yes or No      | 0.030           | 0.011          |
| SE                                           | Nominal       | Yes or No      | 0.026           | 0.011          |
| VTE                                          | Nominal       | Yes or No      | 0.007           | 0.005          |
| Intracranial hemorrhage                      | Nominal       | Yes or No      | 0.003           | 0.009          |
| GI bleeding                                  | Nominal       | Yes or No      | 0.031           | 0.012          |
| Other bleeding <sup>‡</sup>                  | Nominal       | Yes or No      | 0.018           | 0.003          |
| Concomitant medication                       |               |                |                 |                |
| ACE inhibitor and ARB                        | Nominal       | Yes or No      | 0.052           | 0.005          |
| β-blocker                                    | Nominal       | Yes or No      | 0.026           | 0.028          |
| Amiodarone                                   | Nominal       | Yes or No      | 0.011           | 0.005          |
| Statins                                      | Nominal       | Yes or No      | 0.040           | 0.022          |
| PPI and H <sub>2</sub> RA                    | Nominal       | Yes or No      | 0.118           | 0.062          |
| Aspirin                                      | Nominal       | Yes or No      | 0.115           | 0.050          |
| P2Y12 inhibitors                             | Nominal       | Yes or No      | 0.049           | 0.009          |

|                          |         |           |       |       |
|--------------------------|---------|-----------|-------|-------|
| Other antiplatelet drugs | Nominal | Yes or No | 0.028 | 0.011 |
| Other anticoagulants     | Nominal | Yes or No | 0.107 | 0.051 |
| NSAIDs                   | Nominal | Yes or No | 0.030 | 0.018 |

Reproduced with permission from Koretsune et al. *Circ J.* 2022;86:213–21.

\*A total of 4,523 patients were included in the study based on the eligibility criteria. The number of patients in this subgroup analysis (n=4,385) are those stratified by renal function. Thus, not every patient included in the study was included in this subgroup analysis

†Includes peripheral artery disease and other peripheral vascular disease

‡Not intracranial or gastrointestinal bleeding

*ACE* angiotensin-converting enzyme, *ARB* angiotensin II receptor blocker, *bpm* beats per minute, *CAD* coronary artery disease, *CHF* congestive heart failure, *eGFR* estimated glomerular filtration rate, *GI* gastrointestinal, *H<sub>2</sub>RA* histamine receptor antagonist, *MI* myocardial infarction, *NSAID* nonsteroidal anti-inflammatory drug, *PPI* proton pump inhibitor, *PVD* peripheral vascular disease, *SE* systemic embolism, *SMD* standardized mean difference, *TIA* transient ischemic attack, *VTE* venous thromboembolism.

Online Resource 2: Patient characteristics stratified by baseline renal function (FAS)

| Variable                                     | CrCl $\geq$ 15 to <30 mL/min  |                               |            | CrCl $\geq$ 30 to <50 mL/min  |                               |            | CrCl $\geq$ 50 to <80 mL/min  |                               |            | CrCl $\geq$ 80 mL/min         |                               |            |
|----------------------------------------------|-------------------------------|-------------------------------|------------|-------------------------------|-------------------------------|------------|-------------------------------|-------------------------------|------------|-------------------------------|-------------------------------|------------|
|                                              | Apixaban<br>(n=415)           | Warfarin<br>(n=411)           | P<br>value | Apixaban<br>(n=1,757)         | Warfarin<br>(n=1,177)         | P<br>value | Apixaban<br>(n=3,061)         | Warfarin<br>(n=2,014)         | P<br>value | Apixaban<br>(n=1,841)         | Warfarin<br>(n=1,396)         | P<br>value |
| Female sex                                   | 286 (68.9)                    | 241 (58.6)                    | <0.01      | 959 (54.6)                    | 585 (49.7)                    | 0.01       | 1,253 (40.9)                  | 784 (38.9)                    | 0.15       | 463 (25.1)                    | 326 (23.4)                    | 0.24       |
| Age (years)                                  | 85.8 $\pm$ 6.7                | 83.5 $\pm$ 7.7                | <0.01      | 81.1 $\pm$ 6.5                | 80.5 $\pm$ 6.9                | 0.01       | 74.1 $\pm$ 7.6                | 72.9 $\pm$ 7.9                | <0.01      | 62.5 $\pm$ 9.8                | 61.7 $\pm$ 9.7                | 0.04       |
| $\geq$ 75 to <85                             | 128 (30.8)                    | 154 (37.5)                    |            | 937 (53.3)                    | 636 (54.0)                    |            | 1,300 (42.5)                  | 782 (38.8)                    |            | 179 (9.7)                     | 106 (7.6)                     |            |
| $\geq$ 85                                    | 257 (61.9)                    | 205 (49.9)                    |            | 563 (32.0)                    | 344 (29.2)                    |            | 230 (7.5)                     | 114 (5.7)                     |            | 3 (0.2)                       | 6 (0.4)                       |            |
| Bodyweight (kg)                              | 47.05 $\pm$ 9.87              | 49.90 $\pm$ 11.27             | <0.01      | 52.67 $\pm$ 9.89              | 53.26 $\pm$ 10.40             | 0.12       | 60.36 $\pm$ 10.19             | 60.09 $\pm$ 10.18             | 0.34       | 72.08 $\pm$ 13.11             | 71.82 $\pm$ 12.79             | 0.58       |
| $\leq$ 40.0                                  | 111 (26.7)                    | 76 (18.5)                     |            | 157 (8.9)                     | 103 (8.8)                     |            | 38 (1.2)                      | 40 (2.0)                      |            | 2 (0.1)                       | 2 (0.1)                       |            |
| >40.0 to $\leq$ 50.0                         | 166 (40.0)                    | 154 (37.5)                    |            | 591 (33.6)                    | 396 (33.6)                    |            | 467 (15.3)                    | 308 (15.3)                    |            | 59 (3.2)                      | 40 (2.9)                      |            |
| >50.0 to $\leq$ 60.0                         | 97 (23.4)                     | 115 (28.0)                    |            | 628 (35.7)                    | 399 (33.9)                    |            | 1,041 (34.0)                  | 698 (34.7)                    |            | 251 (13.6)                    | 170 (12.2)                    |            |
| BMI (kg/m <sup>2</sup> )                     | 21.17 $\pm$ 3.71 <sup>a</sup> | 21.67 $\pm$ 3.82 <sup>a</sup> | 0.10       | 22.14 $\pm$ 3.50 <sup>b</sup> | 22.32 $\pm$ 3.46 <sup>b</sup> | 0.21       | 23.75 $\pm$ 3.47 <sup>c</sup> | 23.64 $\pm$ 3.48 <sup>c</sup> | 0.32       | 26.09 $\pm$ 4.37 <sup>d</sup> | 26.11 $\pm$ 4.38 <sup>d</sup> | 0.90       |
| SBP (mmHg)                                   | 125.8 $\pm$ 24.5 <sup>e</sup> | 124.8 $\pm$ 21.3 <sup>e</sup> | 0.54       | 128.5 $\pm$ 21.0 <sup>f</sup> | 127.3 $\pm$ 19.7 <sup>f</sup> | 0.16       | 130.7 $\pm$ 20.0 <sup>g</sup> | 129.5 $\pm$ 19.7 <sup>g</sup> | 0.04       | 132.0 $\pm$ 19.1 <sup>h</sup> | 131.2 $\pm$ 19.3 <sup>h</sup> | 0.28       |
| DBP (mmHg)                                   | 71.3 $\pm$ 15.7 <sup>e</sup>  | 70.9 $\pm$ 14.9 <sup>e</sup>  | 0.73       | 73.1 $\pm$ 14.7 <sup>i</sup>  | 73.2 $\pm$ 14.2 <sup>i</sup>  | 0.89       | 76.9 $\pm$ 14.4 <sup>j</sup>  | 76.5 $\pm$ 13.9 <sup>j</sup>  | 0.31       | 81.1 $\pm$ 14.9 <sup>k</sup>  | 80.1 $\pm$ 13.7 <sup>k</sup>  | 0.06       |
| CrCl (mL/min)                                | 24.1 $\pm$ 3.9                | 23.2 $\pm$ 4.1                | <0.01      | 40.7 $\pm$ 5.6                | 40.4 $\pm$ 5.6                | 0.15       | 63.5 $\pm$ 8.5                | 63.9 $\pm$ 8.6                | 0.13       | 102.4 $\pm$ 23.2              | 102.4 $\pm$ 23.5              | 0.96       |
| $\geq$ 15 to <30                             | 415 (100.0)                   | 411 (100.0)                   |            | 0 (0.0)                       | 0 (0.0)                       |            | 0 (0.0)                       | 0 (0.0)                       |            | 0 (0.0)                       | 0 (0.0)                       |            |
| $\geq$ 30 to <50                             | 0 (0.0)                       | 0 (0.0)                       |            | 1,757 (100.0)                 | 1,177 (100.0)                 |            | 0 (0.0)                       | 0 (0.0)                       |            | 0 (0.0)                       | 0 (0.0)                       |            |
| Paroxysmal AF                                | 168 (40.5)                    | 136 (33.1)                    | 0.14       | 769 (43.8)                    | 437 (37.1)                    | <0.01      | 1,346 (44.0)                  | 742 (36.8)                    | <0.01      | 766 (41.6)                    | 532 (38.1)                    | <0.01      |
| CHADS <sub>2</sub> score                     | 3.0 [2.0–4.0]                 | 3.0 [2.0–3.0]                 | 0.89       | 2.0 [2.0–3.0]                 | 2.0 [2.0–3.0]                 | 0.70       | 2.0 [1.0–3.0]                 | 2.0 [1.0–3.0]                 | 0.33       | 1.0 [1.0–2.0]                 | 1.0 [1.0–2.0]                 | 0.05       |
| CHA <sub>2</sub> DS <sub>2</sub> -VASc score | 5.0 [4.0–5.0]                 | 5.0 [4.0–5.0]                 | 0.13       | 4.0 [3.0–5.0]                 | 4.0 [3.0–5.0]                 | 0.61       | 3.0 [2.0–4.0]                 | 3.0 [2.0–4.0]                 | 0.03       | 2.0 [1.0–3.0]                 | 2.0 [1.0–3.0]                 | 0.48       |
| HAS-BLED score                               | 3.0 [2.0–4.0]                 | 3.0 [2.0–4.0]                 | 0.02       | 2.0 [2.0–3.0]                 | 2.0 [2.0–3.0]                 | 0.87       | 2.0 [2.0–3.0]                 | 2.0 [1.0–3.0]                 | 0.58       | 1.0 [1.0–2.0]                 | 1.0 [1.0–2.0]                 | 0.89       |
| Comorbidities                                |                               |                               |            |                               |                               |            |                               |                               |            |                               |                               |            |
| CHF                                          | 210 (50.6)                    | 216 (52.6)                    | 0.57       | 547 (31.1)                    | 410 (34.8)                    | 0.04       | 699 (22.8)                    | 500 (24.8)                    | 0.09       | 366 (19.9)                    | 327 (23.4)                    | 0.02       |
| Hypertension                                 | 356 (85.8)                    | 364 (88.6)                    | 0.03       | 1,455 (82.8)                  | 949 (80.6)                    | 0.14       | 2,305 (75.3)                  | 1,528 (75.9)                  | 0.56       | 1,296 (70.4)                  | 997 (71.4)                    | 0.54       |
| Diabetes                                     | 93 (22.4)                     | 89 (21.7)                     | 0.79       | 382 (21.7)                    | 257 (21.8)                    | 0.95       | 642 (21.0)                    | 419 (20.8)                    | 0.91       | 391 (21.2)                    | 334 (23.9)                    | 0.07       |
| Dyslipidemia                                 | 117 (28.2)                    | 120 (29.2)                    | 0.75       | 583 (33.2)                    | 340 (28.9)                    | 0.01       | 1,000 (32.7)                  | 609 (30.2)                    | 0.08       | 560 (30.4)                    | 402 (28.8)                    | 0.31       |
| CAD                                          | 91 (21.9)                     | 91 (22.1)                     | 0.94       | 302 (17.2)                    | 215 (18.3)                    | 0.45       | 428 (14.0)                    | 340 (16.9)                    | <0.01      | 216 (11.7)                    | 200 (14.3)                    | 0.03       |
| PAD <sup>l</sup>                             | 24 (5.8)                      | 27 (6.6)                      | 0.64       | 93 (5.3)                      | 48 (4.1)                      | 0.13       | 111 (3.6)                     | 97 (4.8)                      | 0.04       | 45 (2.4)                      | 74 (5.3)                      | <0.01      |
| Medical history                              |                               |                               |            |                               |                               |            |                               |                               |            |                               |                               |            |
| Stroke/TIA                                   | 88 (21.2)                     | 78 (19.0)                     | 0.59       | 288 (16.4)                    | 201 (17.1)                    | 0.58       | 329 (10.7)                    | 200 (9.9)                     | 0.38       | 126 (6.8)                     | 93 (6.7)                      | 0.82       |
| Bleeding <sup>m</sup>                        | 7 (1.7)                       | 13 (3.2)                      | 0.14       | 25 (1.4)                      | 25 (2.1)                      | 0.14       | 44 (1.4)                      | 26 (1.3)                      | 0.68       | 21 (1.1)                      | 12 (0.9)                      | 0.42       |
| Concomitant medication                       |                               |                               |            |                               |                               |            |                               |                               |            |                               |                               |            |

|                          |            |            |      |              |            |       |              |            |       |              |            |       |
|--------------------------|------------|------------|------|--------------|------------|-------|--------------|------------|-------|--------------|------------|-------|
| Antiplatelet drugs       | 165 (39.8) | 166 (40.4) | 0.85 | 564 (32.1)   | 392 (33.3) | 0.50  | 681 (22.2)   | 525 (26.1) | <0.01 | 289 (15.7)   | 270 (19.3) | <0.01 |
| ACEi or ARB              | 202 (48.7) | 233 (56.7) | 0.02 | 844 (48.0)   | 564 (47.9) | 0.95  | 1,249 (40.8) | 893 (44.3) | 0.01  | 678 (36.8)   | 539 (38.6) | 0.30  |
| Beta blocker             | 94 (22.7)  | 93 (22.6)  | 0.99 | 349 (19.9)   | 225 (19.1) | 0.62  | 541 (17.7)   | 351 (17.4) | 0.82  | 339 (18.4)   | 216 (15.5) | 0.03  |
| Amiodarone               | 10 (2.4)   | 13 (3.2)   | 0.51 | 47 (2.7)     | 23 (2.0)   | 0.21  | 21 (0.7)     | 20 (1.0)   | 0.23  | 27 (1.5)     | 25 (1.8)   | 0.47  |
| PPI or H <sub>2</sub> RA | 196 (47.2) | 174 (42.3) | 0.16 | 631 (35.9)   | 366 (31.1) | <0.01 | 877 (28.7)   | 492 (24.4) | <0.01 | 436 (23.7)   | 217 (15.5) | <0.01 |
| NSAIDs                   | 27 (6.5)   | 26 (6.3)   | 0.92 | 120 (6.8)    | 65 (5.5)   | 0.15  | 138 (4.5)    | 75 (3.7)   | 0.17  | 53 (2.9)     | 42 (3.0)   | 0.83  |
| Apixaban dose            |            |            |      |              |            |       |              |            |       |              |            |       |
| 5 mg b.i.d.              | 31 (7.5)   | NA         |      | 373 (21.2)   | NA         |       | 1,816 (59.3) | NA         |       | 1,531 (83.2) | NA         |       |
| 2.5 mg b.i.d.            | 371 (89.4) | NA         |      | 1,363 (77.6) | NA         |       | 1,205 (39.4) | NA         |       | 275 (14.9)   | NA         |       |
| Other                    | 13 (3.1)   | NA         |      | 21 (1.2)     | NA         |       | 40 (1.3)     | NA         |       | 35 (1.9)     | NA         |       |

Data are presented as mean±SD, n (%), or median [IQR]. The P values are based on Student's *t*-test for continuous variables; chi-square test for categorical variables; and Wilcoxon rank-sum test for CHADS<sub>2</sub>, CHA<sub>2</sub>DS<sub>2</sub>-VASc, and HAS-BLED scores

<sup>a</sup>Apixaban, n=313; warfarin, n=330

<sup>b</sup>Apixaban, n=1,388; warfarin, n=931

<sup>c</sup>Apixaban, n=2,494; warfarin, n=1,663

<sup>d</sup>Apixaban, n=1,576; warfarin, n=1,198

<sup>e</sup>Apixaban, n=404; warfarin, n=395

<sup>f</sup>Apixaban, n=1,700; warfarin, n=1,149

<sup>g</sup>Apixaban, n=2,949; warfarin, n=1,977

<sup>h</sup>Apixaban, n=1,779; warfarin, n=1,348

<sup>i</sup>Apixaban, n=1,699; warfarin, n=1,149

<sup>j</sup>Apixaban, n=2,949; warfarin, n=1,975

<sup>k</sup>Apixaban, n=1,779; Warfarin, n=1,347

<sup>l</sup>PAD and other peripheral vascular diseases

<sup>m</sup>Intracranial hemorrhage, gastrointestinal bleeding, and other types of bleeding

ACEi angiotensin-converting enzyme inhibitor, AF atrial fibrillation, ARB angiotensin II receptor blocker, *b.i.d.* twice daily, BMI body mass index, CAD coronary artery disease, CHF congestive heart failure, CrCl creatinine clearance, DBP diastolic blood pressure, FAS full analysis set, H<sub>2</sub>RA histamine receptor antagonist, IQR interquartile range, NA not applicable, NSAID nonsteroidal anti-inflammatory drug, PAD peripheral artery disease, PPI proton pump inhibitor, PSM propensity score matching, SBP systolic blood pressure, SD standard deviation, SMD standardized mean difference, TIA transient ischemic attack

Online Resource 3: Patient characteristics stratified by renal function decline (CrCl change <0 mL/min per year) during the study (FAS)

| Variable                                     | Quartile 1              |                         |            | Quartile 2              |                         |            | Quartile 3              |                         |            | Quartile 4              |                         |            |
|----------------------------------------------|-------------------------|-------------------------|------------|-------------------------|-------------------------|------------|-------------------------|-------------------------|------------|-------------------------|-------------------------|------------|
|                                              | Apixaban<br>(n=968)     | Warfarin<br>(n=659)     | P<br>value | Apixaban<br>(n=968)     | Warfarin<br>(n=659)     | P<br>value | Apixaban<br>(n=968)     | Warfarin<br>(n=659)     | P<br>value | Apixaban<br>(n=967)     | Warfarin<br>(n=658)     | P<br>value |
| Female sex                                   | 431 (44.5)              | 255 (38.7)              | 0.02       | 404 (41.7)              | 263 (39.9)              | 0.46       | 446 (46.1)              | 291 (44.2)              | 0.45       | 424 (43.8)              | 279 (42.4)              | 0.56       |
| Age (years)                                  | 75.3±9.2                | 74.3±10.2               | 0.04       | 75.7±9.3                | 73.9±10.1               | <0.01      | 74.2±10.6               | 73.0±10.4               | 0.02       | 73.0±12.2               | 72.3±12.5               | 0.26       |
| ≥75 to <85                                   | 418 (43.2)              | 254 (38.5)              |            | 414 (42.8)              | 251 (38.1)              |            | 366 (37.8)              | 239 (36.3)              |            | 315 (32.6)              | 202 (30.7)              |            |
| ≥85                                          | 144 (14.9)              | 98 (14.9)               |            | 168 (17.4)              | 90 (13.7)               |            | 153 (15.8)              | 84 (12.7)               |            | 171 (17.7)              | 113 (17.2)              |            |
| Bodyweight (kg)                              | 59.34±12.86             | 59.01±12.63             | 0.62       | 59.58±12.30             | 59.76±12.39             | 0.78       | 60.49±13.28             | 61.36±13.49             | 0.20       | 61.65±14.90             | 60.80±14.35             | 0.26       |
| ≤40.0                                        | 44 (4.5)                | 37 (5.6)                |            | 36 (3.7)                | 28 (4.2)                |            | 46 (4.8)                | 33 (5.0)                |            | 53 (5.5)                | 37 (5.6)                |            |
| >40.0 to ≤50.0                               | 202 (20.9)              | 135 (20.5)              |            | 190 (19.6)              | 133 (20.2)              |            | 176 (18.2)              | 107 (16.2)              |            | 168 (17.4)              | 126 (19.1)              |            |
| >50.0 to ≤60.0                               | 292 (30.2)              | 198 (30.0)              |            | 300 (31.0)              | 187 (28.4)              |            | 279 (28.8)              | 180 (27.3)              |            | 249 (25.7)              | 167 (25.4)              |            |
| BMI (kg/m <sup>2</sup> )                     | 23.52±3.69 <sup>a</sup> | 23.38±3.70 <sup>a</sup> | 0.49       | 23.76±4.03 <sup>b</sup> | 23.58±3.61 <sup>b</sup> | 0.42       | 23.96±4.19 <sup>c</sup> | 24.46±4.20 <sup>c</sup> | 0.03       | 24.22±4.58 <sup>d</sup> | 24.10±4.59 <sup>d</sup> | 0.64       |
| SBP (mmHg)                                   | 129.4±18.6 <sup>e</sup> | 128.9±18.9 <sup>e</sup> | 0.59       | 130.5±19.9 <sup>f</sup> | 129.8±19.3 <sup>f</sup> | 0.52       | 131.5±20.7 <sup>g</sup> | 130.5±19.6 <sup>g</sup> | 0.33       | 133.0±23.0 <sup>h</sup> | 129.3±20.6 <sup>h</sup> | <0.01      |
| DBP (mmHg)                                   | 74.8±13.3 <sup>e</sup>  | 75.7±13.3 <sup>e</sup>  | 0.18       | 75.7±14.2 <sup>f</sup>  | 76.3±13.6 <sup>f</sup>  | 0.35       | 77.6±15.1 <sup>g</sup>  | 76.7±14.1 <sup>g</sup>  | 0.20       | 79.3±17.2 <sup>i</sup>  | 77.1±15.2 <sup>i</sup>  | 0.01       |
| CrCl (mL/min)                                | 59.1±22.5               | 59.3±25.9               | 0.84       | 62.3±24.2               | 62.4±26.9               | 0.95       | 68.7±27.4               | 68.9±27.9               | 0.90       | 74.7±35.4               | 73.8±36.2               | 0.64       |
| ≥15 to <30                                   | 66 (6.8)                | 75 (11.4)               |            | 49 (5.1)                | 55 (8.3)                |            | 38 (3.9)                | 33 (5.0)                |            | 60 (6.2)                | 44 (6.7)                |            |
| ≥30 to <50                                   | 284 (29.3)              | 177 (26.9)              |            | 265 (27.4)              | 172 (26.1)              |            | 219 (22.6)              | 147 (22.3)              |            | 187 (19.3)              | 130 (19.8)              |            |
| Paroxysmal AF                                | 441 (45.6)              | 250 (37.9)              | <0.01      | 434 (44.8)              | 215 (32.6)              | <0.01      | 386 (39.9)              | 241 (36.6)              | <0.01      | 353 (36.5)              | 233 (35.4)              | 0.06       |
| CHADS <sub>2</sub> score                     | 2.0 [1.0–3.0]           | 2.0 [1.0–3.0]           | 0.65       | 2.0 [1.0–3.0]           | 2.0 [1.0–3.0]           | 0.08       | 2.0 [1.0–3.0]           | 2.0 [1.0–3.0]           | 0.01       | 2.0 [1.0–3.0]           | 2.0 [1.0–3.0]           | 0.81       |
| CHA <sub>2</sub> DS <sub>2</sub> -VASc score | 3.0 [2.0–4.0]           | 3.0 [2.0–4.0]           | 0.17       | 4.0 [3.0–5.0]           | 3.0 [2.0–4.0]           | <0.01      | 3.0 [2.0–4.0]           | 4.0 [2.0–5.0]           | 0.10       | 4.0 [2.0–5.0]           | 3.0 [2.0–5.0]           | 0.79       |
| HAS-BLED score                               | 2.0 [2.0–3.0]           | 2.0 [1.0–3.0]           | 0.41       | 2.0 [2.0–3.0]           | 2.0 [1.0–3.0]           | 0.01       | 2.0 [2.0–3.0]           | 2.0 [2.0–3.0]           | 0.15       | 2.0 [1.0–3.0]           | 2.0 [1.0–3.0]           | 0.77       |
| Comorbidities                                |                         |                         |            |                         |                         |            |                         |                         |            |                         |                         |            |
| CHF                                          | 216 (22.3)              | 173 (26.3)              | 0.06       | 252 (26.0)              | 195 (29.6)              | 0.12       | 292 (30.2)              | 254 (38.5)              | <0.01      | 345 (35.7)              | 241 (36.6)              | 0.70       |
| Hypertension                                 | 737 (76.1)              | 502 (76.2)              | 0.86       | 778 (80.4)              | 518 (78.6)              | 0.39       | 782 (80.8)              | 541 (82.1)              | 0.44       | 771 (79.7)              | 508 (77.2)              | 0.21       |
| Diabetes                                     | 215 (22.2)              | 144 (21.9)              | 0.90       | 228 (23.6)              | 165 (25.0)              | 0.49       | 205 (21.2)              | 164 (24.9)              | 0.08       | 233 (24.1)              | 147 (22.3)              | 0.41       |
| Dyslipidemia                                 | 324 (33.5)              | 211 (32.0)              | 0.58       | 341 (35.2)              | 201 (30.5)              | 0.05       | 319 (33.0)              | 208 (31.6)              | 0.58       | 280 (29.0)              | 152 (23.1)              | <0.01      |
| CAD                                          | 152 (15.7)              | 114 (17.3)              | 0.37       | 166 (17.1)              | 126 (19.1)              | 0.31       | 146 (15.1)              | 130 (19.7)              | 0.01       | 127 (13.1)              | 103 (15.7)              | 0.15       |
| PAD <sup>j</sup>                             | 51 (5.3)                | 33 (5.0)                | 0.83       | 46 (4.8)                | 34 (5.2)                | 0.71       | 33 (3.4)                | 42 (6.4)                | <0.01      | 35 (3.6)                | 24 (3.6)                | 0.98       |
| Medical history                              |                         |                         |            |                         |                         |            |                         |                         |            |                         |                         |            |
| Stroke/TIA                                   | 132 (13.6)              | 83 (12.6)               | 0.52       | 131 (13.5)              | 68 (10.3)               | 0.05       | 115 (11.9)              | 96 (14.6)               | 0.09       | 104 (10.8)              | 77 (11.7)               | 0.49       |
| Bleeding <sup>k</sup>                        | 15 (1.5)                | 13 (2.0)                | 0.53       | 15 (1.5)                | 12 (1.8)                | 0.68       | 11 (1.1)                | 12 (1.8)                | 0.24       | 16 (1.7)                | 13 (2.0)                | 0.61       |

| Concomitant medication       |            |            |      |            |            |      |            |            |      |            |            |       |
|------------------------------|------------|------------|------|------------|------------|------|------------|------------|------|------------|------------|-------|
| Antiplatelet drugs           | 252 (26.0) | 205 (31.1) | 0.03 | 279 (28.8) | 199 (30.2) | 0.55 | 235 (24.3) | 198 (30.0) | 0.01 | 253 (26.2) | 169 (25.7) | 0.83  |
| ACEi or ARB                  | 422 (43.6) | 299 (45.4) | 0.48 | 426 (44.0) | 318 (48.3) | 0.09 | 430 (44.4) | 311 (47.2) | 0.27 | 406 (42.0) | 292 (44.4) | 0.34  |
| Beta blocker                 | 162 (16.7) | 109 (16.5) | 0.92 | 187 (19.3) | 124 (18.8) | 0.80 | 190 (19.6) | 130 (19.7) | 0.96 | 200 (20.7) | 125 (19.0) | 0.40  |
| Amiodarone                   | 7 (0.7)    | 12 (1.8)   | 0.04 | 12 (1.2)   | 12 (1.8)   | 0.34 | 28 (2.9)   | 11 (1.7)   | 0.11 | 17 (1.8)   | 14 (2.1)   | 0.59  |
| PPI or/and H <sub>2</sub> RA | 285 (29.4) | 168 (25.5) | 0.08 | 319 (33.0) | 178 (27.0) | 0.01 | 304 (31.4) | 186 (28.2) | 0.17 | 351 (36.3) | 190 (28.9) | <0.01 |
| NSAIDs                       | 45 (4.6)   | 18 (2.7)   | 0.05 | 43 (4.4)   | 25 (3.8)   | 0.52 | 54 (5.6)   | 33 (5.0)   | 0.62 | 63 (6.5)   | 42 (6.4)   | 0.92  |
| Apixaban dose                |            |            |      |            |            |      |            |            |      |            |            |       |
| 5 mg b.i.d.                  | 462 (47.7) | NA         |      | 479 (49.5) | NA         |      | 487 (50.3) | NA         |      | 529 (54.7) | NA         |       |
| 2.5 mg b.i.d.                | 491 (50.7) | NA         |      | 478 (49.4) | NA         |      | 470 (48.6) | NA         |      | 418 (43.2) | NA         |       |
| Other                        | 15 (1.5)   | NA         |      | 11 (1.1)   | NA         |      | 11 (1.1)   | NA         |      | 20 (2.1)   | NA         |       |

Data are presented as mean±SD, n (%), or median [IQR]. The P values are based on Student's *t*-test for continuous variables; chi-square test for categorical variables; and Wilcoxon rank-sum test for CHADS<sub>2</sub>, CHA<sub>2</sub>DS<sub>2</sub>-VASc, and HAS-BLED scores

<sup>a</sup>Apixaban, n=763; warfarin, n=521

<sup>b</sup>Apixaban, n=786; warfarin, n=518

<sup>c</sup>Apixaban, n=784; warfarin, n=541

<sup>d</sup>Apixaban, n=844; warfarin, n=577

<sup>e</sup>Apixaban, n=947; warfarin, n=650

<sup>f</sup>Apixaban, n=933; warfarin, n=646

<sup>g</sup>Apixaban, n=944; warfarin, n=643

<sup>h</sup>Apixaban, n=926; warfarin, n=639

<sup>i</sup>Apixaban, n=926; warfarin, n=637

<sup>j</sup>PAD and other peripheral vascular diseases

<sup>k</sup>Intracranial hemorrhage, gastrointestinal bleeding, and other types of bleeding

*ACEi* angiotensin-converting enzyme inhibitor, *AF* atrial fibrillation, *ARB* angiotensin II receptor blocker, *b.i.d.* twice daily, *BMI* body mass index, *CAD* coronary artery disease, *CHF* congestive heart failure, *CrCl* creatinine clearance, *DBP* diastolic blood pressure, *FAS* full analysis set, *IQR* interquartile range, *H<sub>2</sub>RA* histamine receptor antagonist, *NA* not applicable, *NSAID* nonsteroidal anti-inflammatory drug, *PAD* peripheral artery disease, *PPI* proton pump inhibitor, *PSM* propensity score matching, *SBP* systolic blood pressure, *SD* standard deviation, *SMD* standardized mean difference, *TIA* transient ischemic attack

Online Resource 4: Impact of the magnitude of renal function decline during the study on the incidence rates of major bleeding and stroke/SE (FAS)

| <b>Event</b>   | <b>Group</b>       | <b>HR (95% CI)<sup>a</sup></b> |
|----------------|--------------------|--------------------------------|
| Major bleeding | Apixaban (n=3,871) | 1.65 (1.35–2.02)               |
|                | Warfarin (n=2,635) | 1.53 (1.23–1.91)               |
| Stroke/SE      | Apixaban (n=3,871) | 1.34 (1.08–1.65)               |
|                | Warfarin (n=2,635) | 1.58 (1.28–1.95)               |

<sup>a</sup>Based on a Cox proportional hazards regression model that included the CrCl quartile (1, 2, 3, and 4) as a continuous variable

*CI* confidence interval, *CrCl* creatinine clearance, *FAS* full analysis set, *HR* hazard ratio, *SE* systemic embolism.
